# Supplementary material for: Difficidin and bacilysin from Bacillus amyloliquefaciens FZB42 have antibacterial activity against Xanthomonas oryzae rice pathogens
Source: PubMed Central journal article supplement (PMC4534799; doi:10.1038/srep12975), 2015-08-13
Supplement: srep12975-s1.pdf [file srep12975-s1.pdf]

## Supplementary Information

### **Difficidin and bacilysin from *Bacillus amyloliquefaciens* FZB42 have antibacterial activity against *Xanthomonas oryzae* rice pathogens**

Liming Wu<sup>1</sup>, Huijun Wu<sup>1</sup>, Lina Chen<sup>1</sup>, Xinfang Yu<sup>1</sup>, Rainer Borriss<sup>2</sup>, Xuewen Gao<sup>1\*</sup>

<sup>1</sup>Department of Plant Pathology, College of Plant Protection, Nanjing Agricultural University, Key Laboratory of Monitoring and Management of Crop Diseases and Pest Insects, Ministry of Education, Nanjing, China

<sup>2</sup>ABiTEP GmbH, Berlin, Germany

\* Corresponding author

Corresponding author:

Xuewen Gao

Email: gaoxw@njau.edu.cn

Telephone/Fax: 86-25-84395268

**Table S1. Bacterial strains used in this study.**

| Strain                      | Description                                                                             | Source or reference |
|-----------------------------|-----------------------------------------------------------------------------------------|---------------------|
| <i>B. amyloliquefaciens</i> |                                                                                         |                     |
| FZB42                       | Wild type, producer of lipopeptides, polyketides and bacilysin                          | 8                   |
| AK1                         | $\Delta bmyA::Em^r$ , deficient in bacillomycin D synthesis                             | 8                   |
| AK2                         | $\Delta fenA::Cm^r$ , deficient in fengycin synthesis                                   | 8                   |
| CH1                         | $\Delta srfA::Em^r$ , deficient in surfactin synthesis                                  | 8                   |
| CH3                         | $\Delta sfp::Em^r$ , deficient in lipopeptides and polyketides synthesis                | 10                  |
| CH6                         | $\Delta bae::Cm^r$ , no synthesis of bacillaene                                         | 10                  |
| CH7                         | $\Delta mln::Cm^r$ , no synthesis of macrolactin                                        | 10                  |
| CH8                         | $\Delta dfn::Em^r$ , no synthesis of difficidin                                         | 10                  |
| RS2                         | $\Delta bac::Cm^r \Delta dfn::Em^r$ , deficient in bacilysin and difficidin             | 26                  |
| RS6                         | $\Delta sfp::Em^r \Delta bac::Cm^r$ , no lipopeptides, polyketides and bacilysin        | 21                  |
| Rice pathogenic bacteria    |                                                                                         |                     |
| PXO99 <sup>A</sup>          | <i>Xanthomonas oryzae</i> pv. <i>oryzae</i> , causal agent of bacterial blight          | 27                  |
| RS105                       | <i>Xanthomonas oryzae</i> pv. <i>oryzicola</i> , causal agent of bacterial leaf streak, | 2                   |
|                             | Rif <sup>r</sup>                                                                        |                     |

**Table S2. DNA primers used in this study.**

| <i>Xanthomonas oryzae</i> pv. <i>oryzae</i> |                        | <i>Xanthomonas oryzae</i> pv. <i>oryzicola</i> |                       |
|---------------------------------------------|------------------------|------------------------------------------------|-----------------------|
| Name                                        | Sequence (5'→3')       | Name                                           | Sequence (5'→3')      |
| 16S-F                                       | TGGCAACTAAGGACAAGGG    | 16S-F                                          | AATGGGCGCAAGCCTGATC   |
| 16S-R                                       | AAGCGGTGGAGTATGTGG     | 16S-R                                          | AACCACCACCTACGCACGC   |
| rpfF-F                                      | GTTGGTCTGATAGCGGGTGA   | rpfF-F                                         | TAGCGGGTGATGTCGTCG    |
| rpfF-R                                      | TGAAGAACCGCAGCGTGAG    | rpfF-R                                         | TGAAGAACCGCAGCGTGAG   |
| gumD-F                                      | TTTCATAGTGC GTGTTGTGCT | gumD-F                                         | AACGACGCACGCATCACG    |
| gumD-R                                      | AACGACGCACGCATCACG     | gumD-R                                         | ATCCAGCCACAGCGACCAAC  |
| ftsZ-F                                      | CTGCTGGACGATGTGAACCTG  | ftsZ-F                                         | CCGTGATGTCGGAAATGGG   |
| ftsZ-R                                      | ATAATCGTTGGGCAGGTCAGC  | ftsZ-R                                         | GCCAGGTTACATCGTCCAG   |
| glmS-F                                      | CCCCAGCGATTTGGCGTAC    | glmS-F                                         | ACGATCAGATGCTGTGGGTTC |
| glmS-R                                      | GCGTATGCGAACCCACAGC    | glmS-R                                         | GCCAAGGGTTTCCCGTCAT   |
| rrlA-F                                      | ACAGGGTGGTATTTCAAGG    | rrlA-F                                         | GCAAACCTCCGAATACCAG   |
| rrlA-R                                      | GCCGCTGCGACTGTTTAT     | rrlA-R                                         | CAACCTCCTGGCTGTCTAT   |

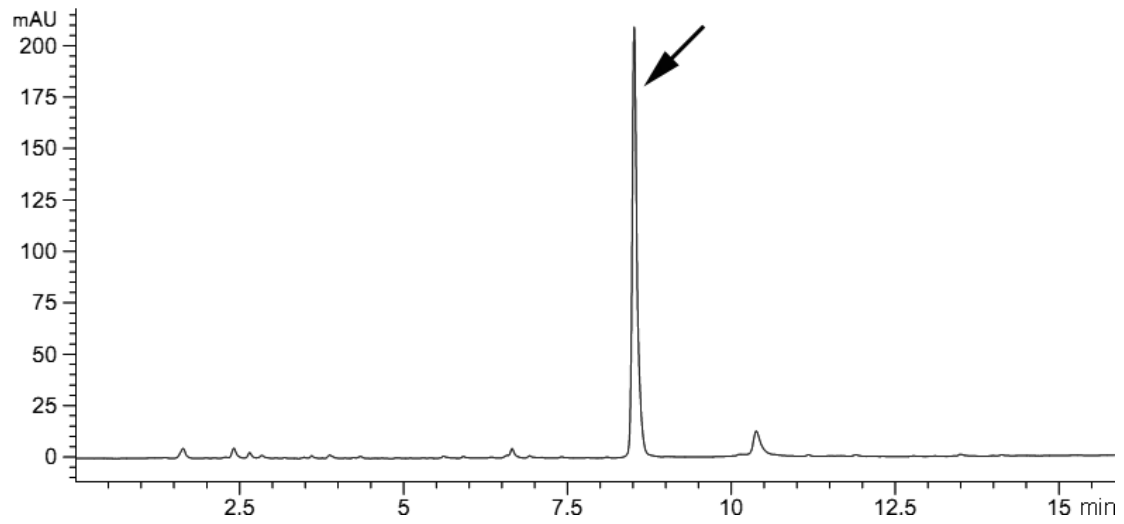

**Fig. S1. HPLC analysis of difficidin from *B. amyloliquefaciens* FZB42.** The retention time of difficidin is 8.574 min

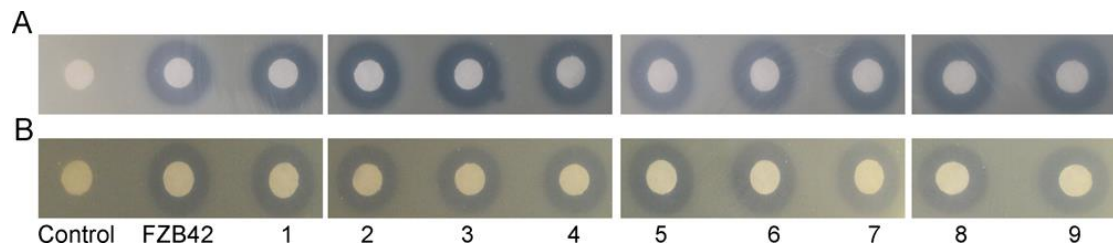

**Fig. S2. Detection of antagonistic action of *B. amyloliquefaciens* mutants strains against *Xanthomonas oryzae* pv. *oryzae* (A) and *Xanthomonas oryzae* pv. *oryzicola* (B) by paper-disc agar diffusion assay.** 1, complemented FZB42 $\Delta$ *sfp* $\Delta$ *amyE::sfp*; 2, complemented FZB42 $\Delta$ *bmyA* $\Delta$ *amyE::bmyA*; 3, complemented FZB42 $\Delta$ *fenA* $\Delta$ *amyE::fenA*; 4, complemented FZB42 $\Delta$ *srfA* $\Delta$ *amyE::srfA*; 5, complemented FZB42 $\Delta$ *bae* $\Delta$ *amyE::bae*; 6, complemented FZB42 $\Delta$ *mln* $\Delta$ *amyE::mln*; 7, complemented FZB42 $\Delta$ *dfn* $\Delta$ *amyE::dfn*; 8, complementation of RS6; 9, complementation of RS2.

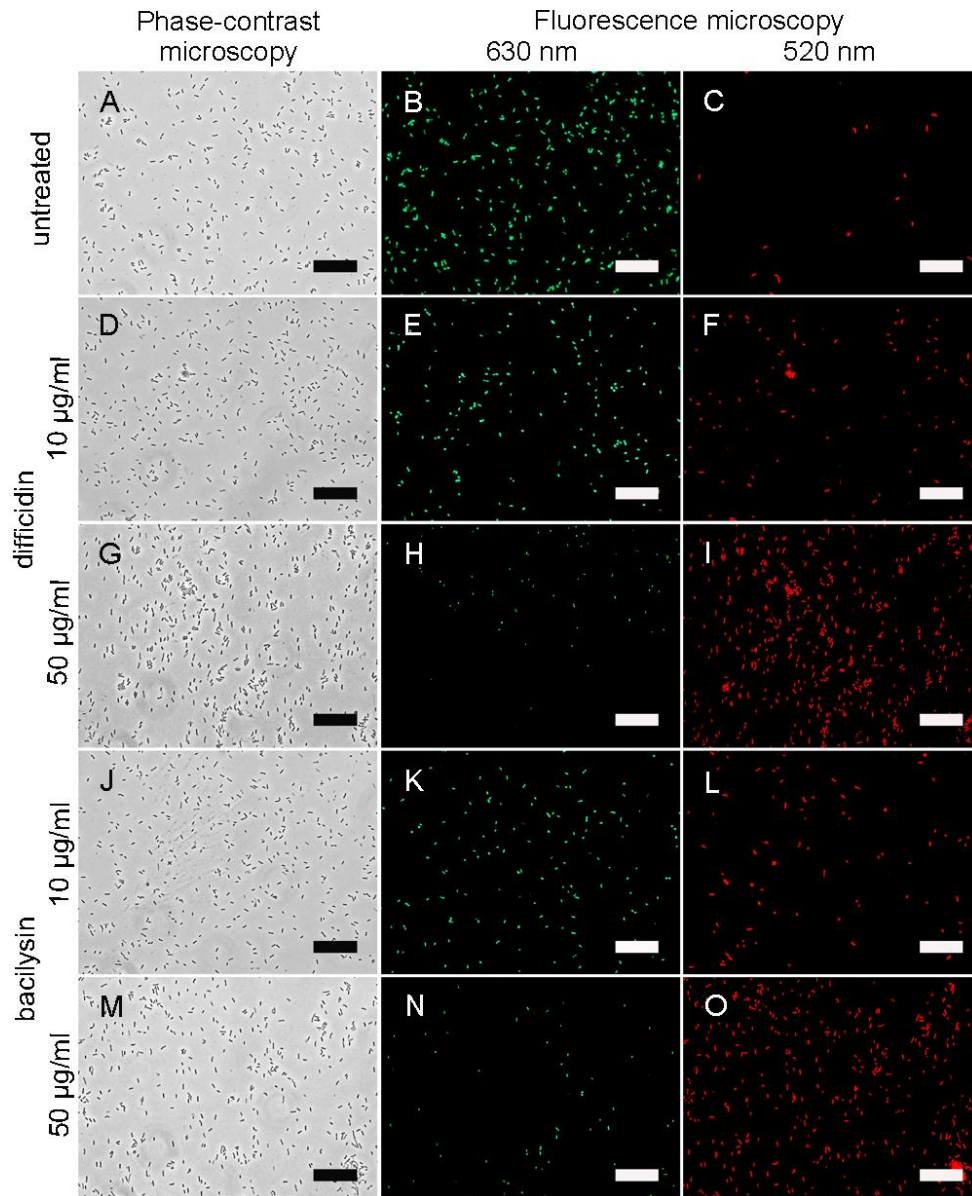

**Fig. S3. Phase-contrast and fluorescence microscope images of *Xanthomonas oryzae* pv.**

***oryzae* cells in the absence and presence of diffcidin or bacilysin after 12 h of cultivation.**

Staining using the LIVE/DEAD BacLight bacterial viability kit assessed bacterial viability: green areas indicate live cells; red areas indicate dead cells. Untreated *X. oryzae* pv. *oryzae* cells were observed by A, phase-contrast microscopy and B-C, fluorescence microscopy. *X. oryzae* pv. *oryzae* cells after treatments with diffcidin (10  $\mu\text{g/ml}$ , 50  $\mu\text{g/ml}$ ) were examined by D and G, phase-contrast microscopy and E-F and H-I, fluorescence microscopy. Pictures were taken after treatments with bacilysin (10  $\mu\text{g/ml}$ , 50  $\mu\text{g/ml}$ ) from the J to L and M to O. Bars indicate 20  $\mu\text{m}$ .

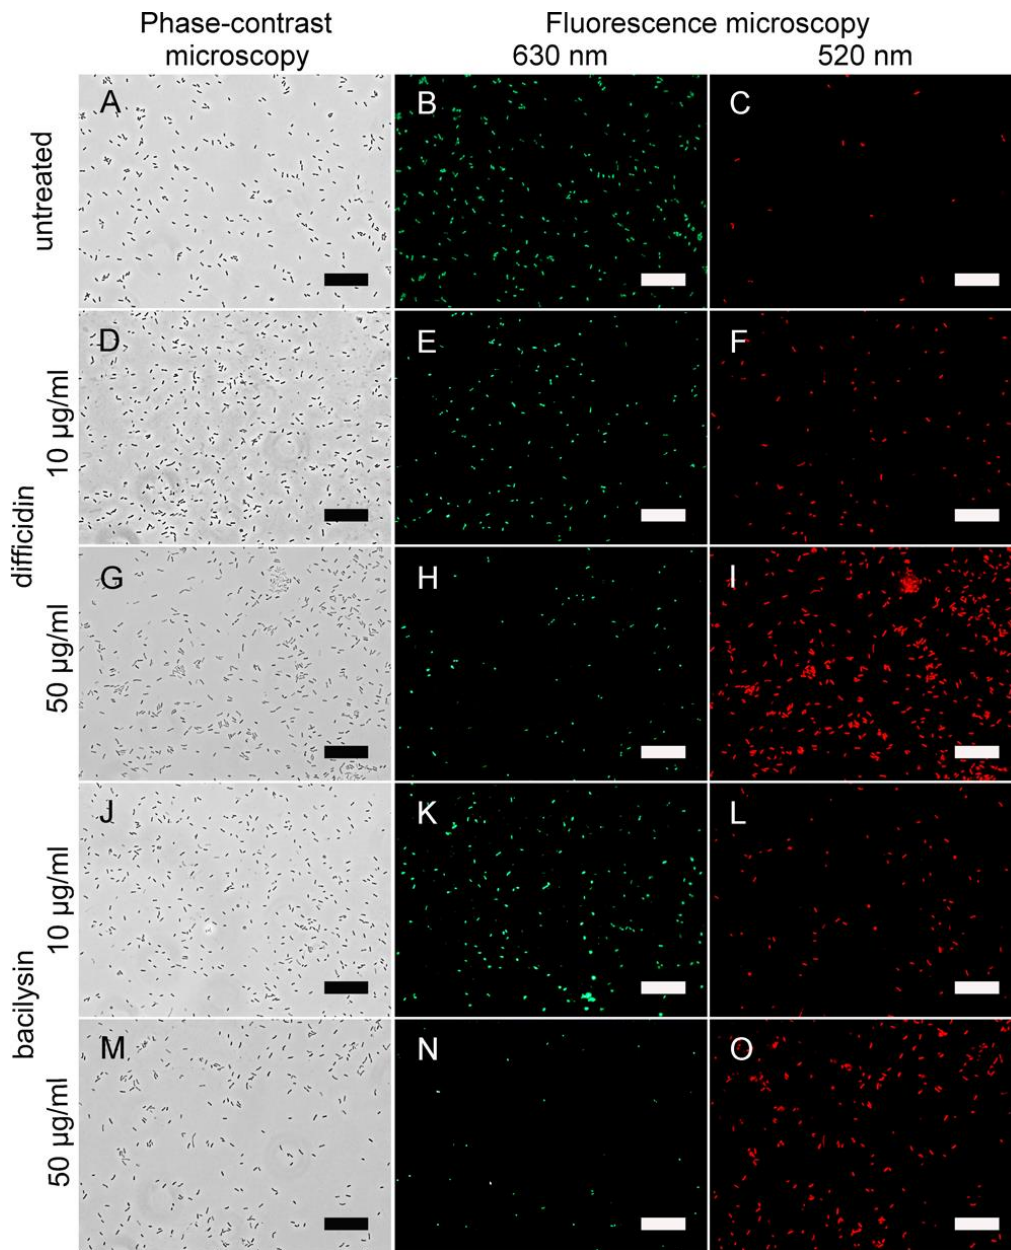

**Fig. S4.** The phase-contrast and fluorescence microscope images of *Xanthomonas oryzae* pv. *oryricola* cells in the absence and presence of diffcidin and bacilysin after 12 h of cultivation. Staining using the LIVE/DEAD BacLight bacterial viability kit assessed bacterial viability: green areas indicate live cells; red areas indicate dead cells. Bars: 20  $\mu\text{m}$ .

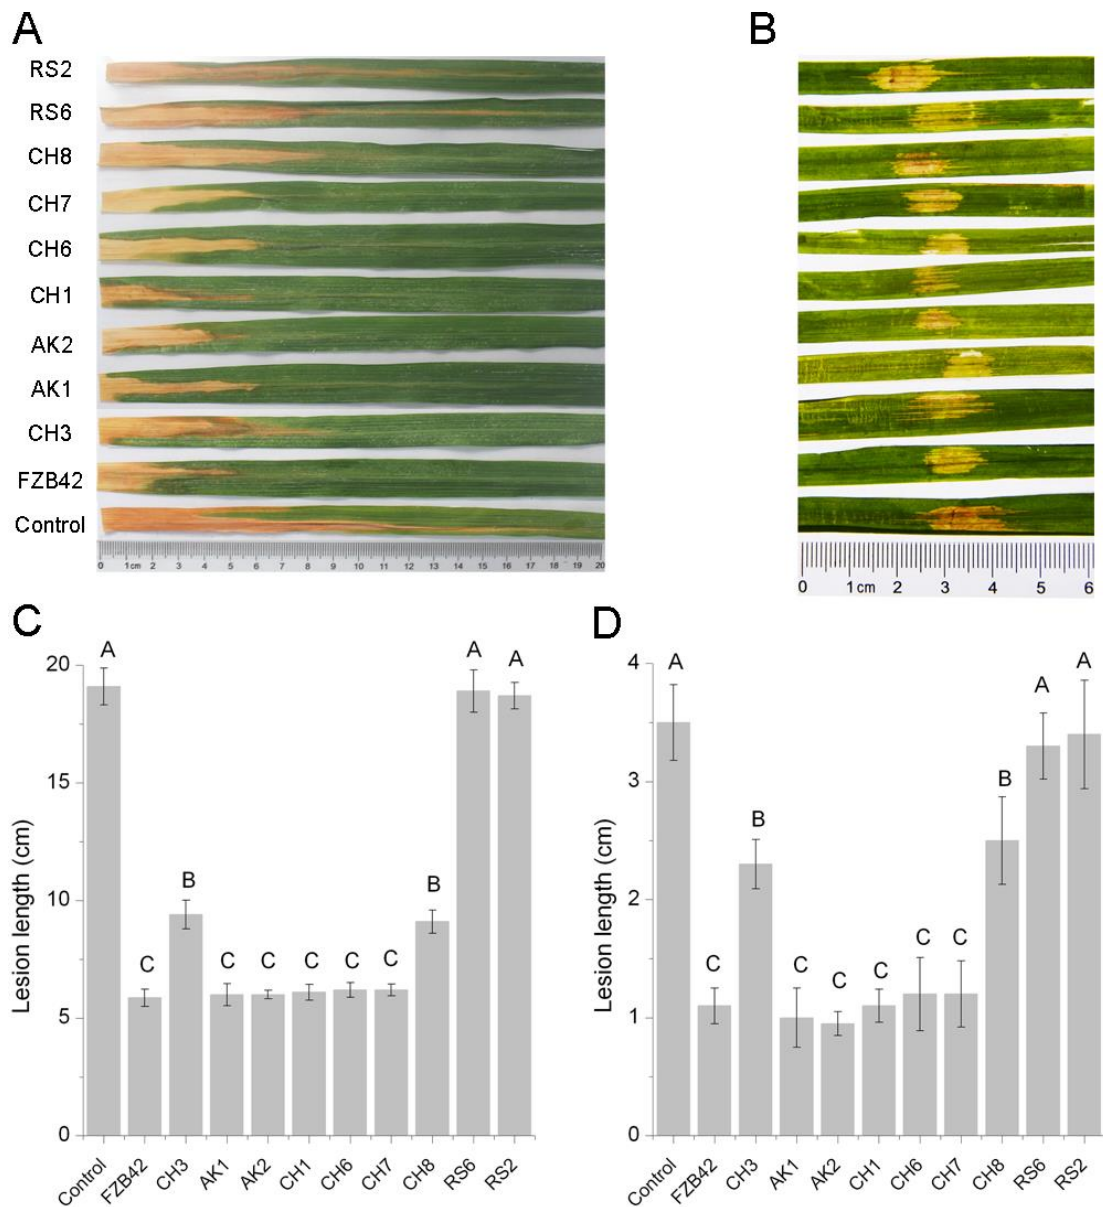

**Fig. S5. Pathogenicity test of *Xanthomonas oryzae* pv. *oryzae* and *Xanthomonas oryzae* pv. *orycolica* strains on rice.** A. Representative result of lesion length symptom tests on the leaves of adult susceptible rice after treatment with *B. amyloliquifaciens* FZB42 mutants. B. Representative result of water-soaking lesion length tests on rice seedling leaves after infiltration with *B. amyloliquifaciens* FZB42 mutants. C. Calculated lesion lengths on the leaves of susceptible adult rice. D. Calculated water-soaking lesion lengths on the leaves of rice seedlings. Data are expressed as means  $\pm$  standard deviation (SD); Different letters indicate means that differ statistically at  $P < 0.01$ .



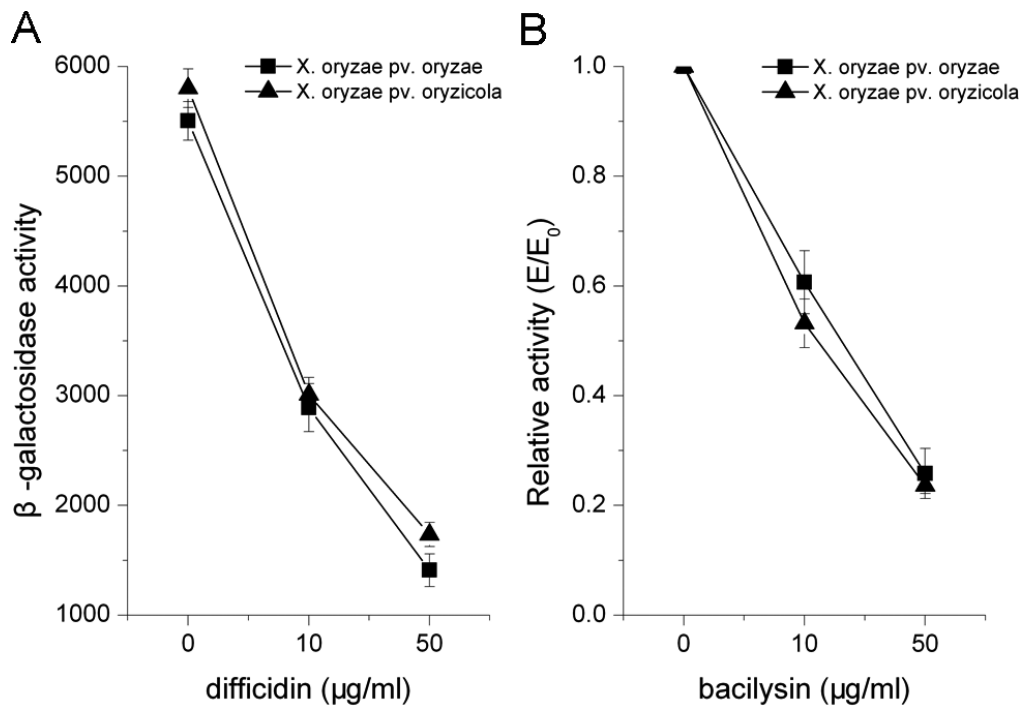

**Fig. S6. The level of gene *rrlA* and of glucosamine synthase activity (encoded by *glmS*) in *Xanthomonas* spp.** A. The *rrlA* activity in *Xanthomonas* spp. treated with 10 µg/ml and 50 µg/ml difficidin for 30 min. β-galactosidase activity was assayed using o-nitrophenyl-β-D-galactopyranoside as the substrate and is reported in Miller units. B. The glucosamine synthase activity of *Xanthomonas* spp. treated with 10 µg/ml and 50 µg/ml bacilysin for 30 min. The measured activity in the sample containing no bacilysin ( $E_0$ ) was 0.501 units for *X. oryzae* pv. *oryzae* and 0.489 units for *X. oryzae* pv. *oryzicola*. E represents the corresponding relative residual activities in the presence of bacilysin.
